# Supplementary material for: KLK6/PAR1 Axis Promotes Tumor Growth and Metastasis by Regulating Cross-Talk between Tumor Cells and Macrophages
Source: MDPI journal article supplement (doi:10.3390/cells11244101), 2022-12-16
Supplement: s1 [file s1]

## Supplementary Figure S1

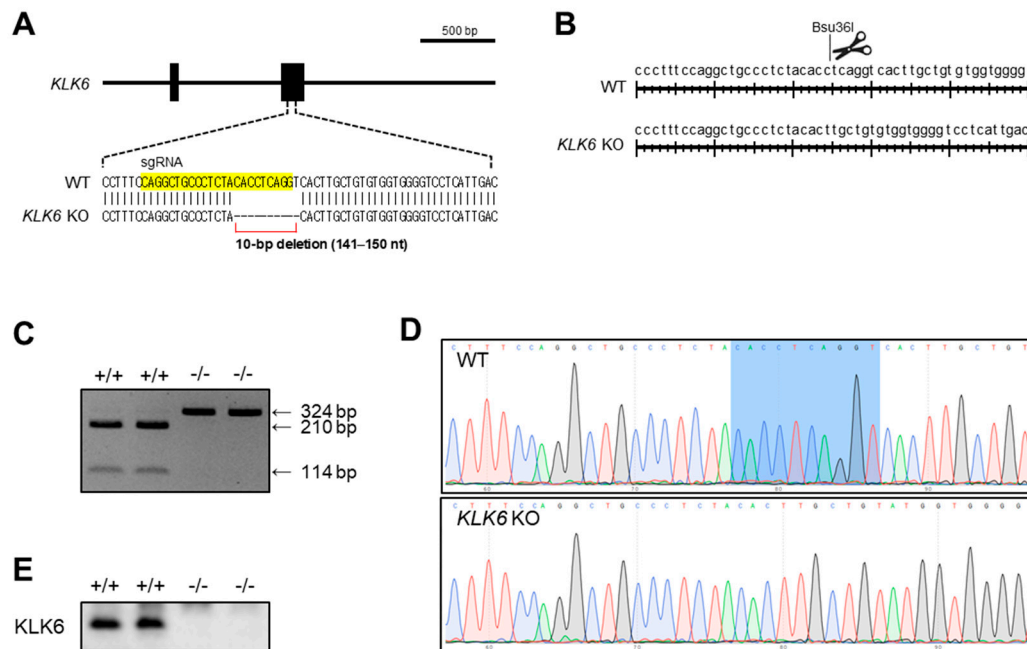

**Supplementary Figure S1. Generation and characterization of *KLK6*<sup>-/-</sup> mice.** (A) Schematic diagram of sgRNA-targeting sites in *KLK6* gene. The sgRNA-targeting sequence is labeled in yellow. The deletion site of *KLK6*-deficient mice is shown as red. (B) Schematic diagram of the Bsu36I enzyme site, which can cut to the deleted part of the sequence of the wild type (WT) *KLK6* gene but cannot cut the *KLK6* gene of *KLK6*-deficient mouse. (C) PCR genotyping with a restriction enzyme. Genomic DNA samples from the WT and *KLK6*-deficient mice were amplified by PCR. PCR products were cut using the Bsu36I enzyme. (D) Representative sequence of *KLK6* from WT and *KLK6*-deficient mouse. The deleted nucleotides are indicated using blue. (E) Immunoblotting results for *KLK6* protein expression levels in WT and *KLK6*-deficient mice serum; +/+, wild-type; -/-, homozygous knockout.

## Supplementary Figure S2

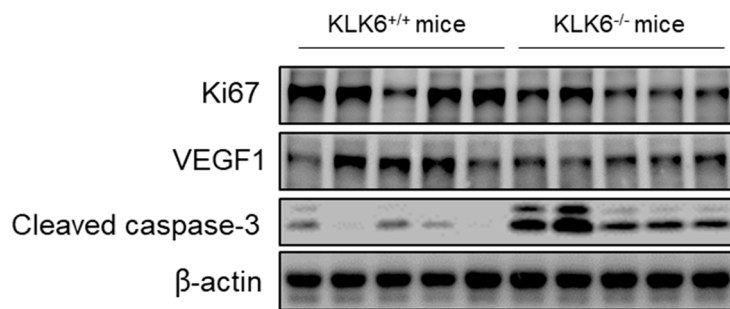

**Supplementary Figure S2. The expression of Ki67, VEGF1, and cleaved caspase-3 in tumor tissues.**  $1 \times 10^6$  cells of B10F10 melanoma were subcutaneously injected into WT and KLK6<sup>-/-</sup> mice. After two weeks, tissue samples were collected from primary tumors. The levels of Ki67, VEGF1, and cleaved caspase-3 proteins in primary tumor tissues from WT and KLK6<sup>-/-</sup> mice were analyzed by Western blot. Data are representative of two experiments. +/+, wild-type; -/-, homozygous knockout.

Supplementary Figure S3

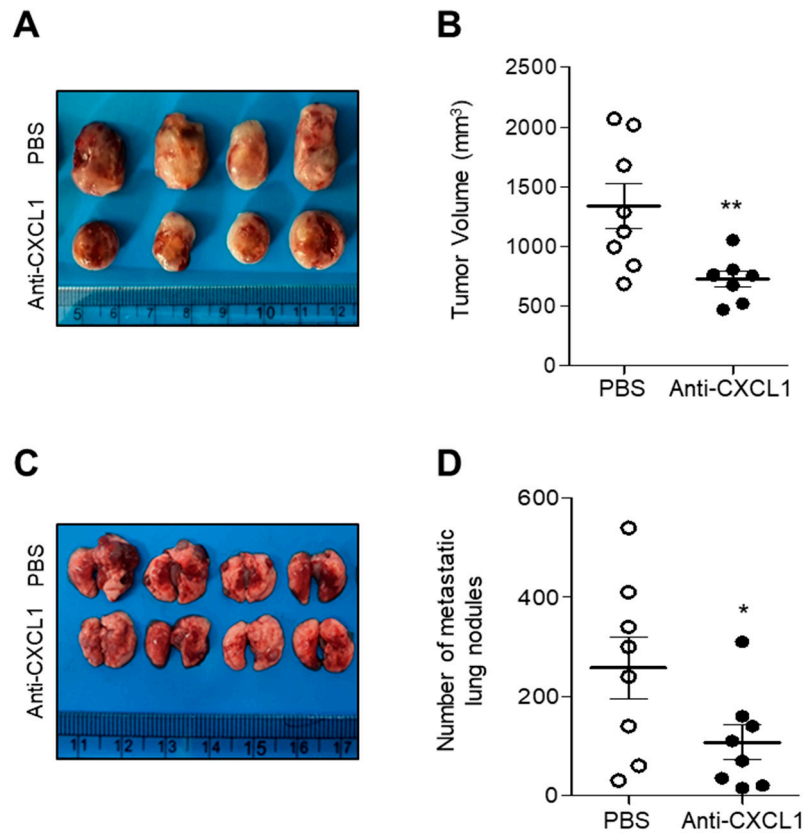

**Supplementary Figure S3. CXCL1 inhibition decreased for tumor growth and metastasis of LLC cells.** (A and B) LLC cells ( $1 \times 10^6$ ) were subcutaneously injected into WT mice ( $n = 8$  per group). After 1 h, mice were injected with PBS (control) or CXCL1 neutralizing antibody (5 mg/kg) every other day for 10 days. (A) Representative photograph of the tumors. (B) Tumor volume was calculated as described in Materials and Methods. (C and D) LLC cells ( $1 \times 10^6$ ) were intravenously injected into the tail vein of WT mice ( $n = 8$  per group). After 1 h, the mice were injected with PBS (control) or CXCL1 neutralizing antibody (5 mg/kg) every other day for 10 days. (C) Representative photograph of metastatic lung nodules. (D) The number of metastatic lung nodules was calculated as described in Materials and Methods. \*\* $P < 0.01$  and \*  $P < 0.05$  (Student's  $t$ -test). +/+, wild-type; -/-, homozygous knockout.

Supplementary Figure S4

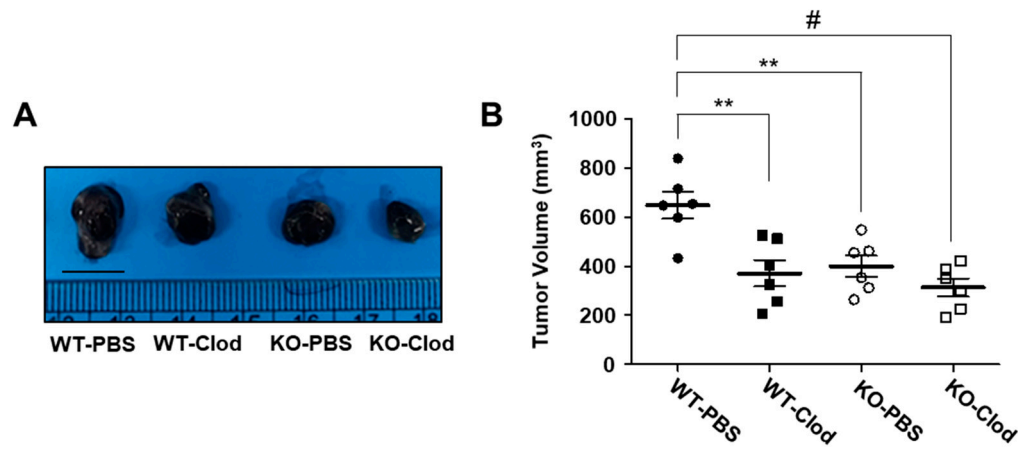

**Supplementary Figure S4. The effect of macrophage depletion on tumor growth.**  $1 \times 10^6$  cells of B16F10 were subcutaneously injected into WT and KLK6<sup>-/-</sup> mice (n=6 per group). After tumors were established (5 days post-injection), PBS-liposome or clodronate-liposome were injected IV every five days until the end of the experiment. (A) Representative photograph of tumors. (B) Tumor volume was calculated as described in Materials and Methods. \*\*p<0.01, #p<0.001. WT, wild-type; KO, KLK6 knockout.

# Supplementary Figure S5

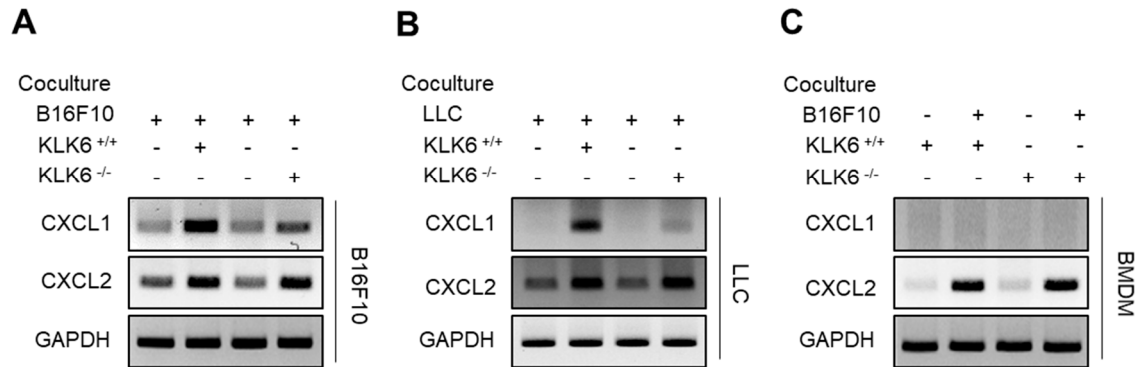

**Supplementary Figure S5. CXCL1 was expressed in B16F10 cancer cells but not in BMDMs.** B16F10 and LLC cells were cocultured with WT or KLK6<sup>-/-</sup> BMDMs for 24 h. The mRNA levels of CXCL1 and CXCL2 in B16F10 cells (A), LLC cells (B), and BMDMs (C) were analyzed by RT-PCR. <sup>+/+</sup>, wild-type; <sup>-/-</sup>, homozygous knockout.

## Supplementary Figure S6

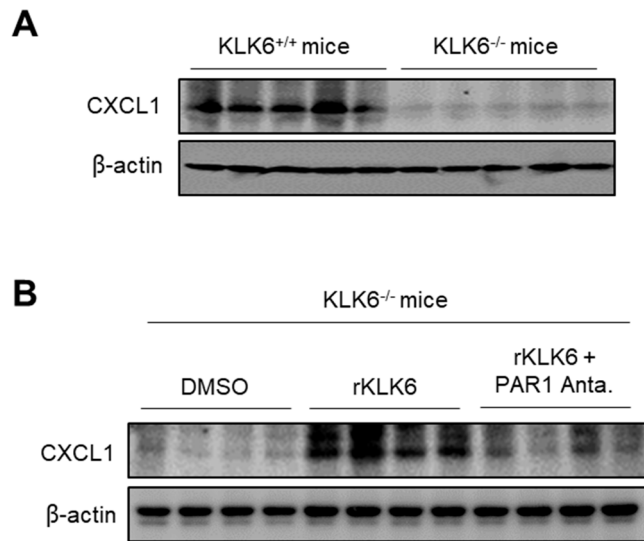

**Supplementary Figure S6. The expression of CXCL1 in tumor tissues.** (A)  $1 \times 10^6$  cells of B10F10 melanoma were subcutaneously injected into WT and KLK6<sup>-/-</sup> mice. (B)  $1 \times 10^6$  cells of B10F10 cells were subcutaneously injected into KLK6<sup>-/-</sup> mice. After 1 h, DMSO (control), rKLK6 (10 mg/kg), or rKLK6 plus PAR1 (5 mM/kg) were injected every other day for ten days. After two weeks, tissue samples were collected from primary tumors. The level of CXCL1 proteins in primary tumor tissues from WT and KLK6<sup>-/-</sup> mice were analyzed by Western blot. +/+, wild-type; -/-, homozygous knockout.

**Supplementary Figure S7**

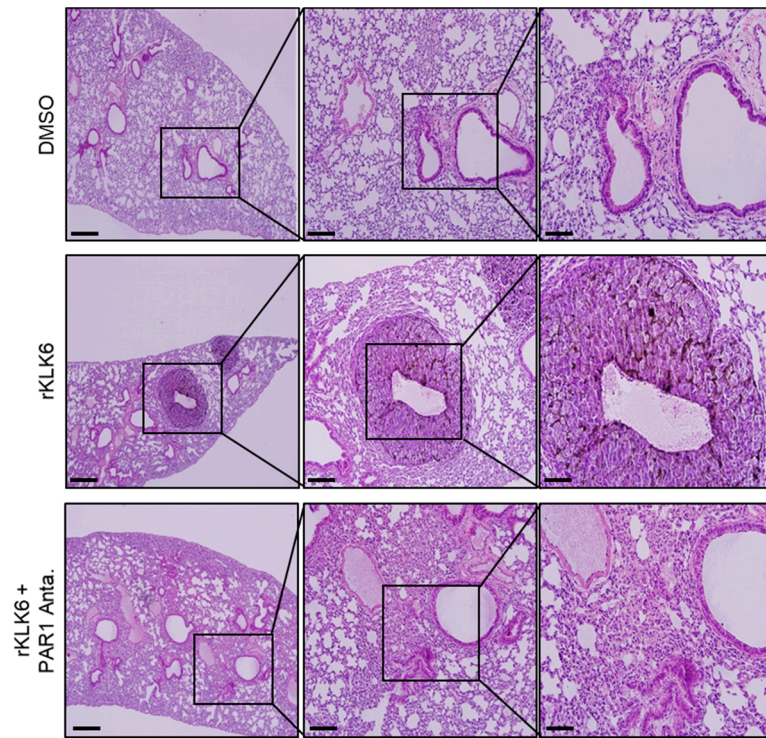

**Supplementary Figure S7. PAR1 inhibitor reduced rKLK6-mediated lung metastasis.**  $5 \times 10^5$  cells of B16F10 melanoma were injected into the tail vein of KLK6  $-/-$  mice. After 1 h, mice were injected with DMSO (control), rKLK6 (10 mg/kg), or rKLK6 plus PAR1 (5 mM/kg) on alternate days for 10 days. Sections of lung organs excised from mice were stained with H&E.

Supplementary Figure S8

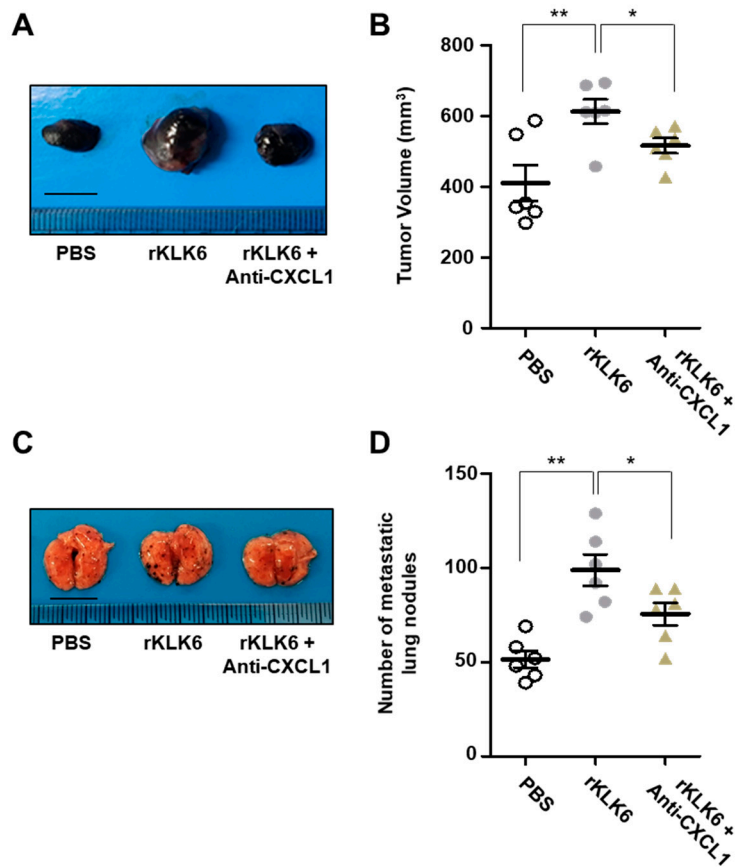

**Supplementary Figure S8. The effect of CXCL1 inhibition on rKLK6-mediated tumor growth and lung metastasis.** (A and B) B16F10 cells ( $1 \times 10^6$ ) were subcutaneously injected into KLK6<sup>-/-</sup> mice. After 1 h, mice were injected with DMSO (control), rKLK6 (10 mg/kg), or rKLK6 plus CXCL1-neutralizing antibody (5 mg/kg) on alternate days for ten days. (A) Representative photograph of the tumors. (B) The tumor volume was measured as described in Materials and Methods. (C and D) B16F10 cells ( $5 \times 10^5$ ) were injected into the tail vein of WT mice. mice were injected with DMSO (control), rKLK6 (10 mg/kg), or rKLK6 plus CXCL1-neutralizing antibody (5 mg/kg) on alternate days for ten days. (C) Representative photograph of metastatic lung nodules. (D) The number of metastatic lung nodules was calculated as described in Materials and Methods. \*\*P < 0.01 and \* P < 0.05 (Student's t-test).



# Supplementary Figure S9

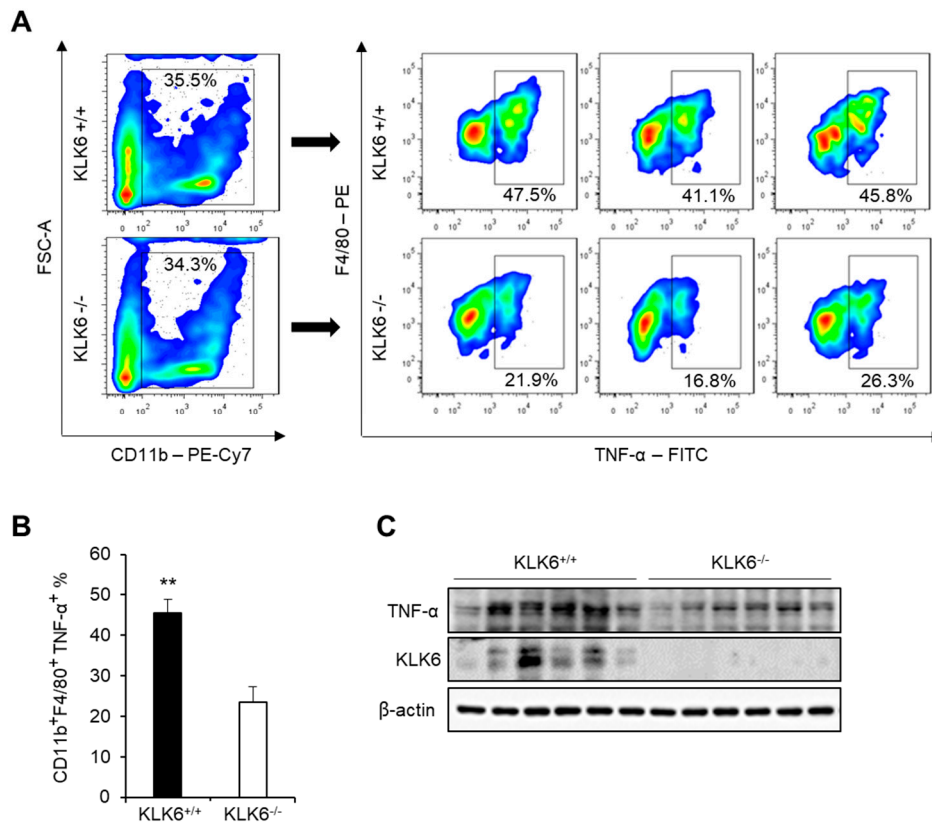

**Supplementary Figure S9. TNF- $\alpha$  were dominantly expressed in macrophages from tumor tissues of WT mice.** B10F10 cells ( $1 \times 10^6$ ) were subcutaneously injected into WT and KLK6 $^{-/-}$  mice. Tumor tissue samples were prepared as described in Materials and Methods ( $n = 6$  per group). CD11b $^{+}$ /F4/80 $^{+}$  macrophage cells were isolated from tumor tissues as described in Materials and Methods. (A) Flow-cytometry analysis of intracellular TNF- $\alpha$  expression in CD11b $^{+}$ /F4/80 $^{+}$  macrophage cells from WT and KLK6 $^{-/-}$  mice tumor tissues. (B) Quantified graph showing the percentage of macrophages with CD11b $^{+}$ /F4/80 $^{+}$ /TNF- $\alpha$  $^{+}$  phenotype in tumor tissues. (C) The levels of TNF- $\alpha$  and KLK6 protein in macrophages isolated from tumor tissues of WT and KLK6 $^{-/-}$  mice were analyzed by Western blot. +/+, wild-type; -/-, homozygous knockout. \*\* $P < 0.01$  (Student's t-test).

Table S1

**Table S1. Sequences of siRNA oligonucleotide template.**

| siRNA   | (5') Sense Sequences (3') | (5') Antisense Sequences (3') |
|---------|---------------------------|-------------------------------|
| KLK6 #1 | CUCUACACCUCAGGUCACUdTdT   | AGUGACCUGAGGUGUAGAGdTdT       |
| KLK6 #2 | GGUGUGGUUAGCAGAUGGAdTdT   | UCCAUCUGCUAACCACACCDdTdT      |
| PAR1 #1 | GACGAGAGGAGAAAGGUGUdTdT   | ACACCUUUCUCCUCUCGUCdTdT       |
| PAR1 #2 | GUGUUCGUCUUGAGGAUGAdTdT   | UCAUCCUCAAGACGAACACdTdT       |
| PAR2 #1 | AGAUCUCCUACCACCUCAAdTdT   | UGUAGGUGGUAGGAGAUCUdTdT       |
| PAR2 #2 | CACUGUGAAUCGCAUGCAAdTdT   | UUGCAUGCGAUUCACAGUGdTdT       |

Table S2

**Table S2. DNA oligomers list used in RT-PCR.**

| Gene Name | (5') Forward Primers (3') | (5') Reverse Primers (3') |
|-----------|---------------------------|---------------------------|
| KLK6      | GCCCTCTACACCTCAGGTCA      | ATCACCTGCAGATTCGGTTT      |
| PAR1      | GTTGATCGTTTCCACGGTCT      | GCAGACGATGAAGATGCAGA      |
| PAR2      | AACATCACCACTGTACGA        | GCACGTAGGCAGATGCAGTA      |
| CXCL1     | CTTGAAGGTGTTGCCCTCAG      | TGGGGACACCTTTTAGCATC      |
| CXCL2     | AGTGAACTGCGCTGTCAATG      | GCCCTTGAGAGTGGCTATGA      |
| GAPDH     | TGTTCTACCCCAATGTGT        | CCCTGTTGCTGTAGCCGTAT      |
